# Supplementary material for: Genomic characterization of 99 viruses from the bunyavirus families Nairoviridae, Peribunyaviridae, and Phenuiviridae, including 35 previously unsequenced viruses
Source: PubMed Central journal article supplement (PMC7951987; doi:10.1371/journal.ppat.1009315), 2021-03-01
Supplement: ppat.1009315.s004.pdf [file ppat.1009315.s004.pdf]

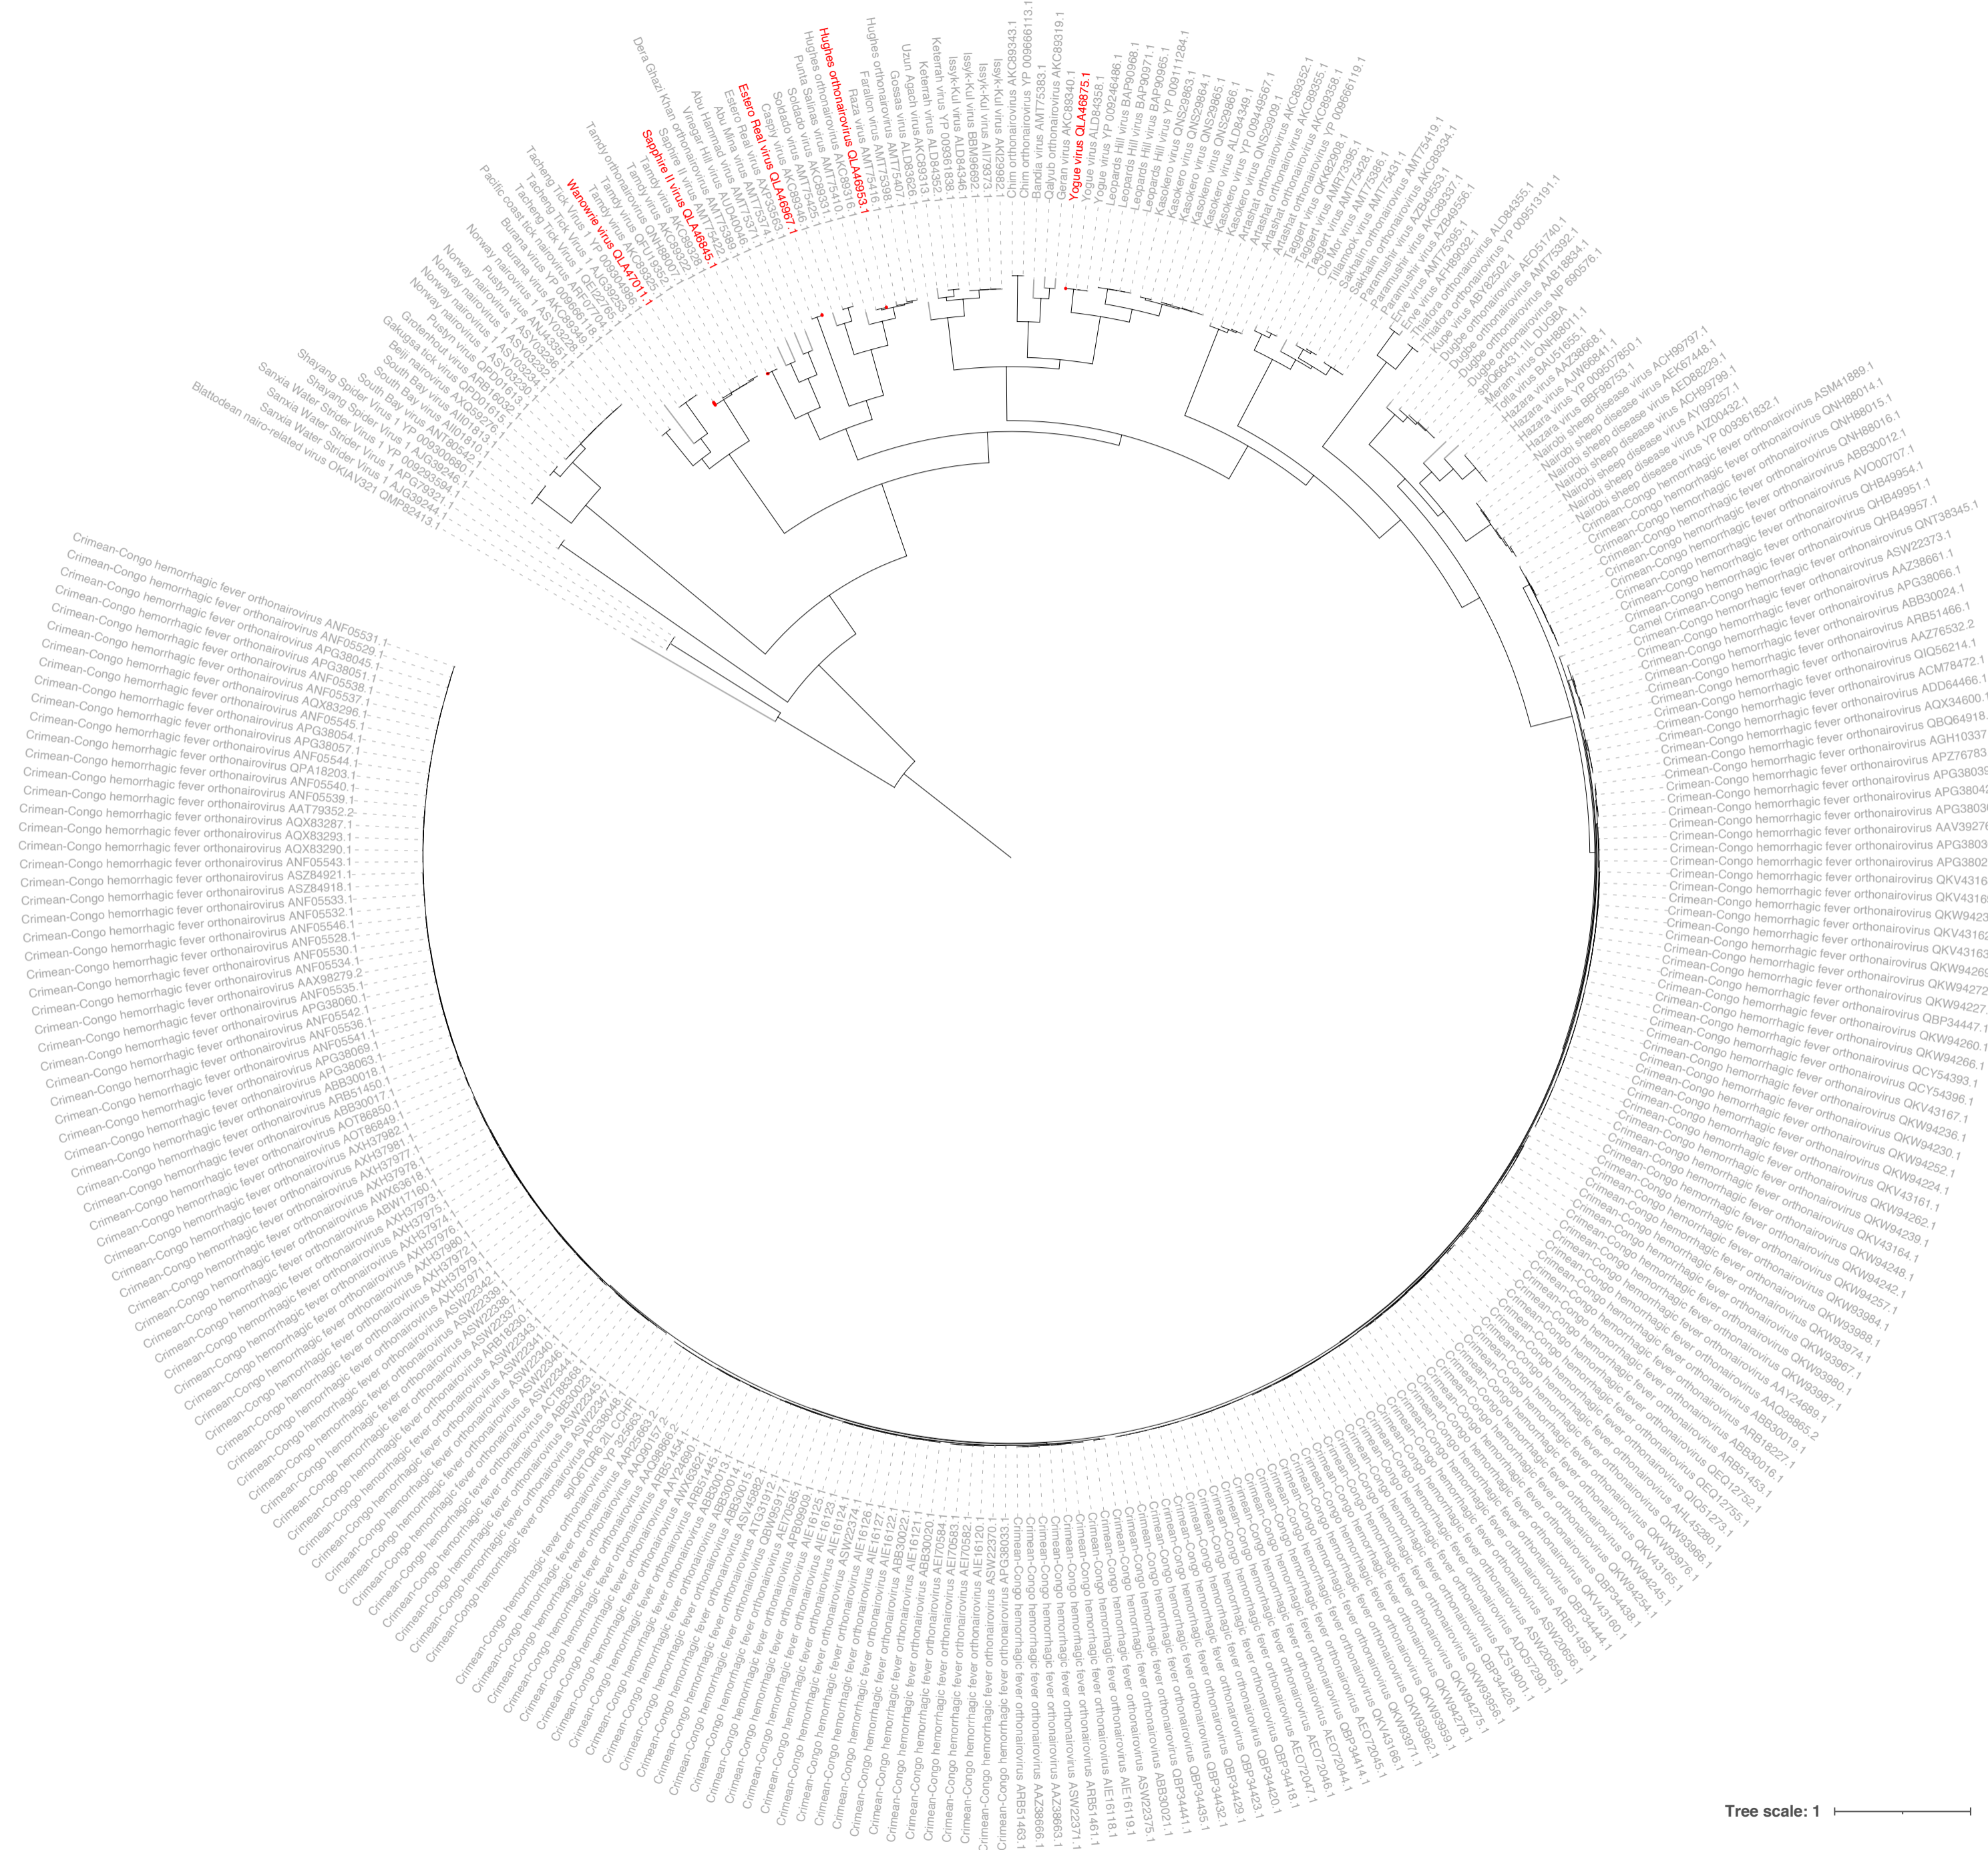

Tree scale: 1
